# Supplementary material for: Relaxing the import proportionality assumption in multi-regional input–output modelling
Source: Springer Nature journal article supplement (doi:10.1186/s40008-021-00250-8), 2021-10-09
Supplement: MOESM1 [file 19744082]

---

**Algorithm 1** Randomize matrix with given column-sums  $u$  and row-sums  $s$

---

**Require:**  $s$  is vector

**Require:**  $u$  is vector

declare empty matrix to store the results:  $T' \leftarrow$ 

|          |          |          |
|----------|----------|----------|
| 0        | ...      | 0        |
| $\vdots$ | $\ddots$ | $\vdots$ |
| 0        | ...      | 0        |

 $\left. \vphantom{\begin{matrix} 0 \\ \vdots \\ 0 \end{matrix}} \right\} \text{length}(s)$   
 $\underbrace{\hspace{1.5cm}}_{\text{length}(u)}$

$s' \leftarrow s$

begin with country  $j \leftarrow 1$

**for**  $i =$  industries in random order **do**

$u' \leftarrow u[i]$

**while** industry  $i$  still requires supply **do**

**if** supply of country  $j \leq$  use of industry  $i$  **then**

            entire supply of  $j$  is allocated to  $i$ :  $T'[j, i] \leftarrow s'[j]$

            remaining need of  $i$  is updated:  $u' \leftarrow u' - s'[j]$

            go to next country:  $j \leftarrow j + 1$

**else**

            industry  $i$  gets entire imported input from country  $j$ :  $T'[j, i] \leftarrow u'$

            remaining supply of country  $j$  is updated:  $s'[j] \leftarrow s'[j] - u'$

            industry  $i$  got its entire imported inputs:  $u' \leftarrow 0$

**end if**

**end while**

**end for**

**return**  $T'$

---
